# Supplementary material for: Proposal of Cryptonemia floridana comb. nov. (Halymeniaceae, Rhodophyta) based on rbcL gene analysis of collections from type locality and female reproductive morphology
Source: publisher site journal article supplement (doi:10.1515/bot-2024-0025), 2024-07-08
Supplement: Supplementary file 1 [file j_bot-2024-0025_suppl_001.docx]

**Supplementary Material**

**Proposal of *Cryptonemia floridana* comb. nov. (Halymeniaceae, Rhodophyta) based on *rbc*L gene analysis of collections from type localityand female reproductive morphology**

Luanda Pereira Soares et al.

DOI 10.1515/bot-2024-0025

**Supplementary Table S1:** Collection information and GenBank accession number for specimens of *Cryptonemia floridana* comb. nov.

| **Collection information** | **Specimen** | **Voucher** | **GenBank accession number** | |
| --- | --- | --- | --- | --- |
| **UPA** | ***rbc*L** |
| Jupiter rocky reef shore, Florida, USA, Coll. T. Sauvage, 05 Sep 2013 | TS1777 | SP470485 | MW881119 | MW272547 |
| Coquina reef, Sebastian Inlet, Florida, USA, Coll. T. Sauvage & L. Santos, 30 Jun 2019 | TS2250 | SP470484 | MW881120 | MW880745 |
| TS2251 | MW881121 | MW880746 |
| TS2255 | MW881122 | MW880747 |
| Itaipava Beach, Espírito Santo, Brazil, Coll. S.M.P.B. Guimarães & M.T. Fujii, 09 March 2016 | HES | SP470483 | – | MW880748 |
| Lázaro Beach, Ubatuba, São Paulo, Brazil, Coll. L.P. Soares & M.T. Fujii, 14 Oct 2016 | U55 | SP470482 | – | MW880751 |
| U54 | – | MW880752 |
| U56 | – | MW880753 |
| U57 | – | MW880754 |
| U58 | – | MW880755 |
| U59 | – | MW880756 |
| Lagoinha Beach, Ubatuba, São Paulo, Brazil, Coll. L.P. Soares & M.T. Fujii, 15 Oct 2016 | U5 | SP470481 | – | MW880750 |
| Lagoinha Beach, Ubatuba, São Paulo, Brazil, Coll. M.T. Fujii, 09 Sep 2017 | C1 | SP470480 | – | MW880749 |
